# Supplementary material for: Coping with Breast Cancer in Ghana: A Qualitative Study of Women’s Lived Experiences Following Breast Cancer Diagnosis
Source: Research Square preprint supplement (doi:10.21203/rs.3.rs-7834537/v1), 2025-11-26
Supplement: Supplementary file 1 [file 9938a279d4852e658dddba2f.docx]

**COPING WITH BREAST CANCER IN GHANA: A QUALITATIVE STUDY OF WOMEN’S LIVED EXPERIENCES FOLLOWING BREAST CANCER DIAGNOSIS**

**QUALITATIVE SEMI-STRUCTURED INTERVIEW GUIDE / QUESTIONS**

**Demographics**

- Age
- Marital status
- Highest level of education
- Profession

1. **Breast Cancer Patients**
2. When were you diagnosed with cancer?
3. At what stage of cancer were you diagnosed?
4. How has breast cancer affected your life?
5. What kind of thoughts frequently go through your mind?
6. How do you feel about it?
7. How has it affected your daily functioning?
8. How has it affected how you view yourself?
9. How has it affected your relationship with others?
10. How has it affected your view of your future?
11. How long have you been on cancer treatment?
12. What cancer treatments did you undergo
    1. Probe: chemotherapy, radiation, and surgery.”
13. Is there anything you would like to add to what we have discussed so far that I didn’t ask you about?
